# Supplementary material for: Development of a Recycling Process and Characterization of EVA, PVDF, and PET Polymers from End-of-Life PV Modules
Source: MDPI journal article supplement (doi:10.3390/ma17040821), 2024-02-08
Supplement: s1 [file s1]

## Supplementary Materials

# Development of a Recycling Process and Characterization of EVA, PVDF and PET Polymers from End-of-Life PV Module

Marek Królikowski <sup>1,\*</sup>, Michał Fotek <sup>2</sup>, Piotr Żach <sup>2</sup> and Marcin Michałowski <sup>3</sup>

<sup>1</sup> Faculty of Chemistry, Warsaw University of Technology, Noakowskiego 3, 00-664 Warsaw, Poland

<sup>2</sup> Faculty of Automotive and Construction Machinery, Warsaw University of Technology, Narbutta 84, 02-524 Warsaw, Poland; michal.fotek@pw.edu.pl (M.F.); piotr.zach@pw.edu.pl (P.Ż.)

<sup>3</sup> Faculty of Mechatronics, Warsaw University of Technology, św. Andrzeja Boboli 8, 02-525 Warsaw, Poland; marcin.michalowski@pw.edu.pl

\* Correspondence: marek.krolikowski@pw.edu.pl; Tel.: +48-22-234-7475

**Table S1.** Density,  $d$  and dynamic viscosity,  $\eta$  of toluene solution during delamination PV module, measured at  $T = 298,15$  K and  $p = 100$  kPa.

| Delamination/%   | $d/\text{g}\cdot\text{cm}^{-3}$ | $\eta/\text{mPa}\cdot\text{s}$ |
|------------------|---------------------------------|--------------------------------|
| 0 (pure solvent) | 0.86231                         | 0.553                          |
| 20               | 0.86253                         | 0.581                          |
| 40               | 0.86265                         | 0.610                          |
| 50               | 0.86277                         | 0.638                          |
| 60               | 0.86283                         | 0.668                          |
| 80               | 0.86298                         | 0.702                          |
| 100              | 0.86315                         | 0.768                          |

Standard uncertainties are  $u(T) = 0.05$  K,  $u(p) = 2$  kPa,  $u(d) = 5 \times 10^{-4} \text{ g}\cdot\text{cm}^{-3}$ ,  $u(\eta) = 0.03 \text{ mPa}\cdot\text{s}$ .

**Citation:** Królikowski, M.; Fotek, M.; Żach, P.; Michałowski, M.

Development of a Recycling Process and Characterization of EVA, PVDF and PET Polymers from End-of-Life PV Module. *Materials* **2024**, *17*, 821. <https://doi.org/10.3390/ma17040821>

Academic Editor: Xuming Xie

Received: 10 January 2024

Revised: 1 February 2024

Accepted: 5 February 2024

Published: 8 February 2024

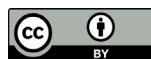

**Copyright:** © 2024 by the authors. Submitted for possible open access publication under the terms and conditions of the Creative Commons Attribution (CC BY) license (<https://creativecommons.org/licenses/by/4.0/>).

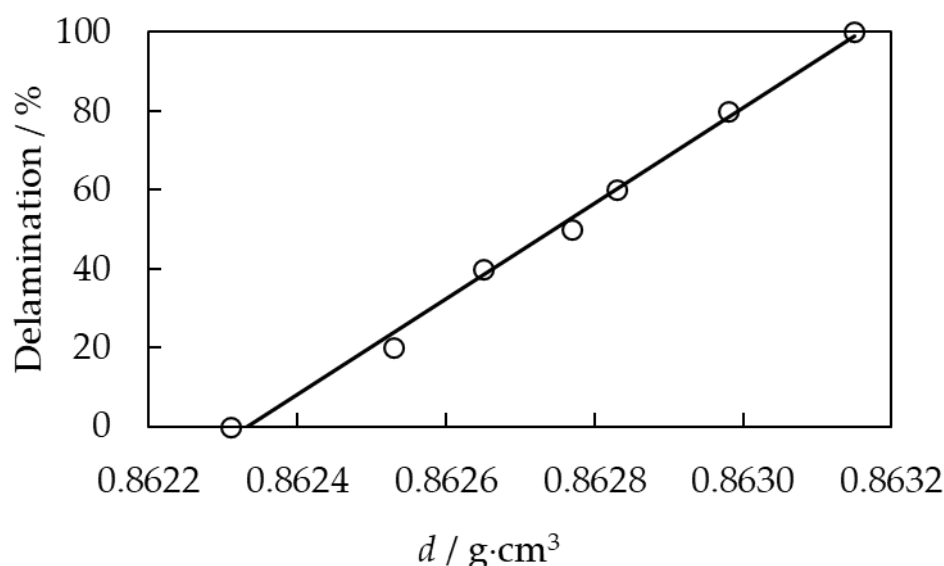

**Figure S1.** PV module delamination (%) as a function of the density toluene solution.

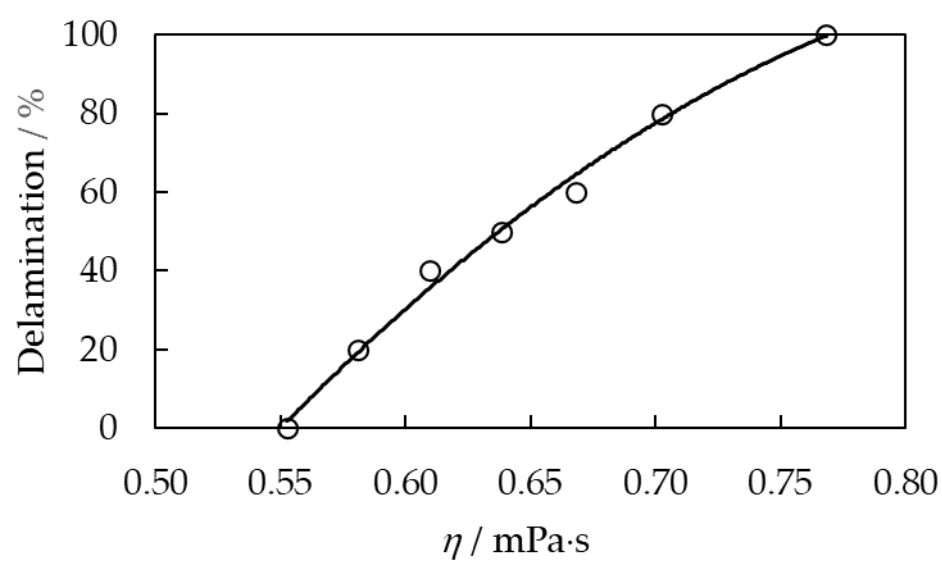

**Figure S2.** PV module delamination (%) as a function of the dynamic viscosity toluene solution.
